# Supplementary material for: B-cell populations are expanded in breast cancer patients compared with healthy controls
Source: PubMed Central journal article supplement (PMC5906508; doi:10.1007/s12282-017-0824-6), 2017-12-04

(A) BC patients

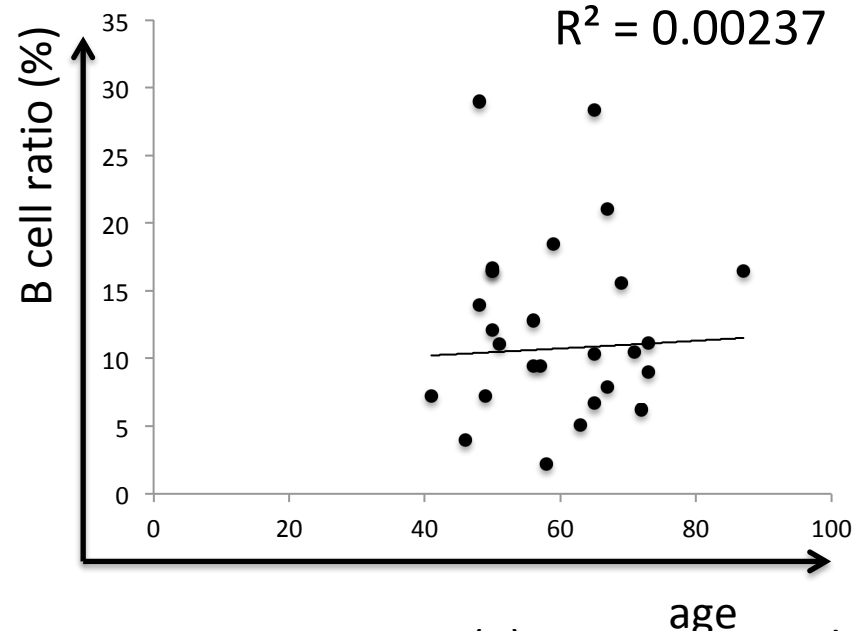

(B) HD

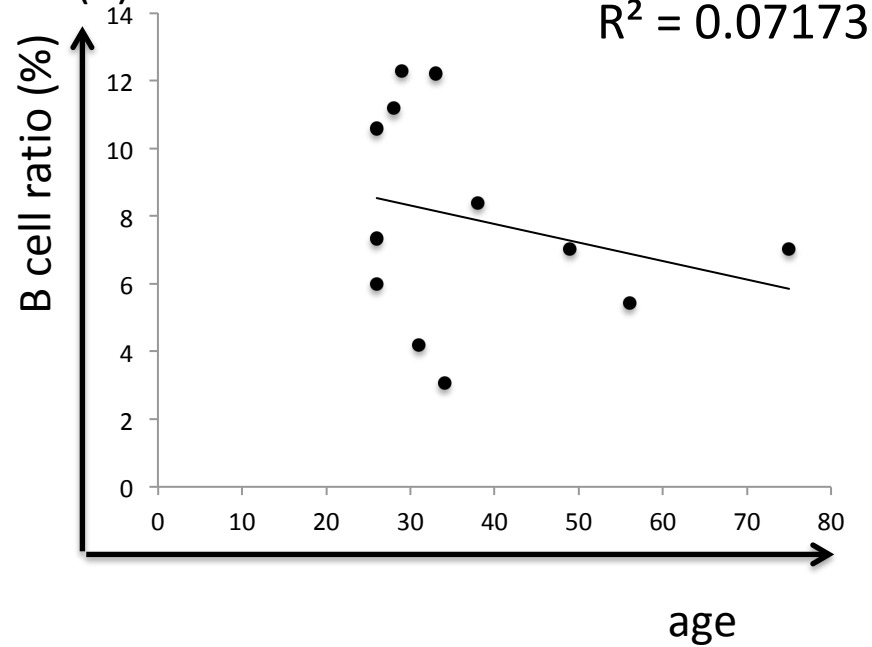

(C) BC patients and HD

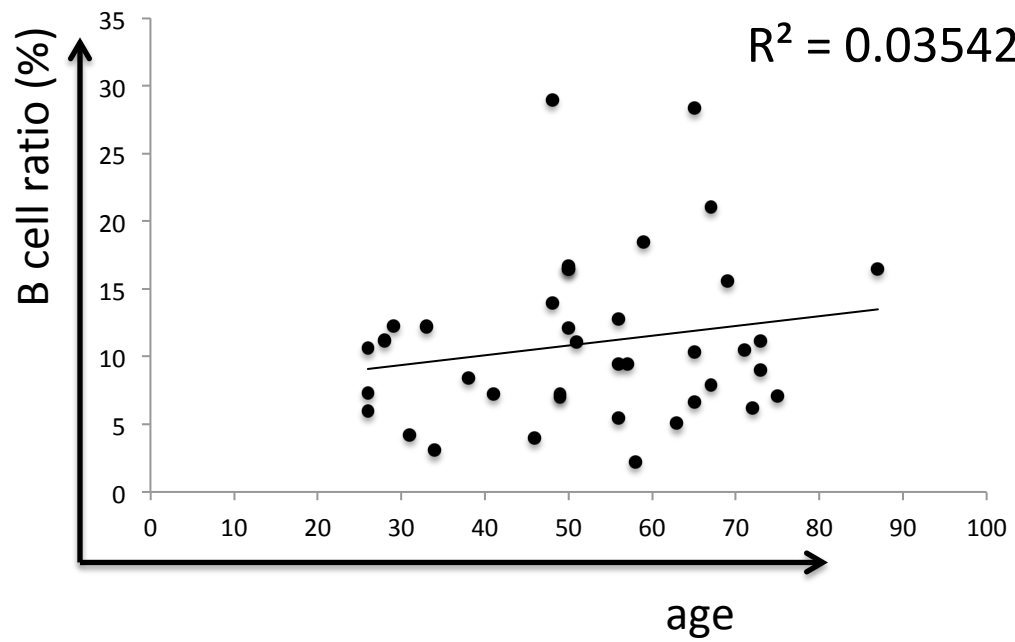

Supplement: 12282_2017_824_MOESM1_ESM.pdf [file 12282_2017_824_MOESM1_ESM.pdf]
