# Supplementary material for: B-cell populations are expanded in breast cancer patients compared with healthy controls
Source: PubMed Central journal article supplement (PMC5906508; doi:10.1007/s12282-017-0824-6), 2017-12-04
Supplement: 12282_2017_824_MOESM2_ESM.pdf [file 12282_2017_824_MOESM2_ESM.pdf]

| patient No. | Age (y/o) | Pathological classification | Tumor size (mm) | LN metastasis | ER expression (%) | PgR expression(%) | HER2 score(IHC) | Ki67 (%) | B cell ratio (%) | T1 ratio (%) | T3 ratio (%) | Naïve B cell ratio (%) | Memory B cell ratio (%) | Plasma cell ratio (%) |
|-------------|-----------|-----------------------------|-----------------|---------------|-------------------|-------------------|-----------------|----------|------------------|--------------|--------------|------------------------|-------------------------|-----------------------|
| 1           | 65        | scirrhous                   | 30x25           | -             | 90                | 0                 | 1               | 20       | 28.35            | 2.71         | 97.3         | 3.19                   | 71.1                    | 22.8                  |
| 2           | 59        | mucinous                    | 25x15           | -             | 90                | 30                | 0               | 10       | 18.5             | 9.86         | 90.1         | 5.7                    | 75.3                    | 22.4                  |
| 3           | 50        | papillotubular              | 12x12           | -             | 90                | 90                | 1               | 5        | 12.08            | 9.55         | 89.9         | 3.26                   | 73.6                    | 22.8                  |
| 4           | 50        | mucinous                    | 20x10           | -             | 90                | 40                | 1               | 10       | 16.49            | 1.82         | 98.1         | 12.1                   | 67.2                    | 26.2                  |
| 5           | 56        | papillotubular              | 10x10           | -             | 0                 | 0                 | 1               | 10       | 12.78            | 1.69         | 98.3         | 8.07                   | 63.5                    | 32.6                  |
| 6           | 57        | scirrhous                   | 28x14           | -             | 0                 | 0                 | 0               | 50       | 9.43             | 3.95         | 94.4         | 6.6                    | 73.8                    | 22.9                  |
| 7           | 71        | papillotubular              | 20x15           | +             | 0                 | 0                 | 0               | 20       | 10.46            | 8.01         | 92           | 5.73                   | 43.5                    | 52.2                  |
| 8           | 67        | papillotubular              | 15x15           | -             | 90                | 80                | 1               | 5        | 21.08            | 2.6          | 97.3         | 16.8                   | 65.1                    | 30.2                  |
| 9           | 58        | scirrhous                   | 30x25           | -             | 100               | 5                 | 0               | 10       | 2.23             | 32.7         | 67.2         | 1.52                   | 62.8                    | 33.4                  |
| 10          | 73        | mucinous                    | 65x70x          | +             | 90                | 60                | 1               | 10       | 11.14            | 11.1         | 88.9         | 6.68                   | 44.6                    | 49.5                  |
| 11          | 72        | mucinous                    | 17x10           | -             | 0                 | 0                 | 0               | 20       | 6.23             | 0.79         | 91.3         | 3.72                   | 70.2                    | 26.5                  |
| 12          | 67        | mucinous                    | 22x10           | -             | 0                 | 0                 | 1               | 5        | 7.88             | 3.74         | 95.6         | 5.39                   | 60.3                    | 36.2                  |
| 13          | 51        | papillotubular              | 10x10           | -             | 0                 | 0                 | 0               | 5        | 11.04            | 16.3         | 83.4         | 7.06                   | 35.3                    | 62.6                  |
| 14          | 48        | papillotubular              | 16x15           | -             | 70                | 60                | 1               | 5        | 13.96            | 0.91         | 99           | 10.8                   | 75.2                    | 20.7                  |
| 15          | 65        | papillotubular              | 61x59 ,us       | -             | 90                | 70                | 0               | 10       | 10.35            | 16.7         | 82.6         | 6.51                   | 50                      | 48                    |
| 16          | 48        | papillotubular              | 15x5            | -             | 10                | 5                 | 0               | 5        | 29               | 15           | 84.7         | 26                     | 93.4                    | 5.44                  |
| 17          | 73        | mucinous                    | 15x10           | -             | 90                | 80                | 0               | 20       | 8.99             | 6.19         | 93.8         | 5.92                   | 39                      | 57.8                  |
| 18          | 46        | DCIS                        | 0               | -             | 70                | 70                | 3               | 5        | 3.94             | 1.45         | 98.1         | 3.09                   | 76.7                    | 21.4                  |
| 19          | 41        | papillotubular              | 7x7             | -             | 90                | 90                | 0               | 5        | 7.26             | 12.3         | 86.8         | 5.2                    | 65.2                    | 28.6                  |
| 20          | 49        | papillotubular              | 16x12           | -             | 70                | 70                | 2               | 5        | 7.26             | 16.2         | 83.5         | 4.48                   | 51.5                    | 40.9                  |
| 21          | 56        | papillotubular              | 11x10           | -             | 90                | 10                | 2               | 1        | 9.45             | 5.97         | 93.6         | 6.35                   | 77                      | 15.3                  |
| 22          | 50        | mucinous                    | 20x10           | -             | 90                | 40                | 1               | 10       | 16.49            | 1.82         | 98.1         | 12.1                   | 67.2                    | 26.2                  |
| 23          | 65        | scirrhous                   | 16x15           | -             | 90                | 80                | 0               | 5        | 6.66             | 6.78         | 92.4         | 5.74                   | 86.4                    | 10.9                  |
| 24          | 50        | mucinous                    | 20x10           | -             | 90                | 40                | 1               | 10       | 16.65            | 9.73         | 90.2         | 12.9                   | 71.3                    | 21.5                  |
| 25          | 69        | apocrine                    | 16x16           | -             | 0                 | 0                 | 2               | 20       | 15.6             | 9.91         | 89.9         | 10.6                   | 53.9                    | 44.2                  |
| 26          | 63        | ILC                         | 14x5            | 0             | 90                | 90                | 2               | 5        | 5.06             | 3.34         | 94.3         | 16.5                   | 76.9                    | 20.1                  |
| 27          | 87        | papillotubular              | 17x16 ,us       | -             | 90                | 0                 | 1               | 20       | 16.49            | 1.82         | 98.1         | 12.1                   | 67.2                    | 26.2                  |
| HD          |           |                             |                 |               |                   |                   |                 |          |                  |              |              |                        |                         |                       |
| 1           | 26        |                             |                 |               |                   |                   |                 |          | 10.6             | 26.1         | 73.6         | 5.72                   | 45.1                    | 52.6                  |
| 2           | 26        |                             |                 |               |                   |                   |                 |          | 7.35             | 6.78         | 93.2         | 3.77                   | 46.2                    | 48                    |
| 3           | 33        |                             |                 |               |                   |                   |                 |          | 12.22            | 1            | 99           | 8.89                   | 57.1                    | 37.2                  |
| 4           | 75        |                             |                 |               |                   |                   |                 |          | 7.04             | 6.7          | 93.3         | 4.8                    | 65                      | 30.6                  |
| 5           | 56        |                             |                 |               |                   |                   |                 |          | 5.42             | 17.1         | 82.9         | 3.46                   | 69.6                    | 28                    |
| 6           | 26        |                             |                 |               |                   |                   |                 |          | 5.99             | 14           | 85.1         | 3.78                   | 77.1                    | 20.1                  |
| 7           | 31        |                             |                 |               |                   |                   |                 |          | 4.2              | 14.6         | 85.4         | 3.22                   | 59.2                    | 38.6                  |
| 8           | 34        |                             |                 |               |                   |                   |                 |          | 3.06             | 11.7         | 88.3         | 2.41                   | 46.5                    | 47.6                  |
| 9           | 49        |                             |                 |               |                   |                   |                 |          | 7.03             | 8.7          | 91.3         | 4.16                   | 41                      | 53.7                  |
| 10          | 28        |                             |                 |               |                   |                   |                 |          | 11.18            | 0.88         | 99           | 8.17                   | 46.9                    | 46                    |
| 11          | 38        |                             |                 |               |                   |                   |                 |          | 8.4              | 2.04         | 97.8         | 6.04                   | 54.5                    | 41.7                  |
| 12          | 29        |                             |                 |               |                   |                   |                 |          | 12.3             | 3.61         | 96.4         | 9.56                   | 36.1                    | 59.3                  |

Supplemental table 1: The age, tissue type, tumor diameter, lymph node metastasis, ER, PgR, HER2, Ki-67, ratio of differentiation stages of B cells in each patient.
